# Supplementary material for: LI-RADS LR-5 on contrast-enhanced ultrasonography has satisfactory diagnostic specificity for hepatocellular carcinoma: a systematic review and meta-analysis
Source: PubMed Central journal article supplement — Quant Imaging Med Surg. 2023 Jan 10;13(2):957–69. doi: 10.21037/qims-22-591 (PMC9929373; doi:10.21037/qims-22-591), 2023-01-10
Supplement: qims-13-02-957-supplementary.pdf [file qims-13-02-957-supplementary.pdf]

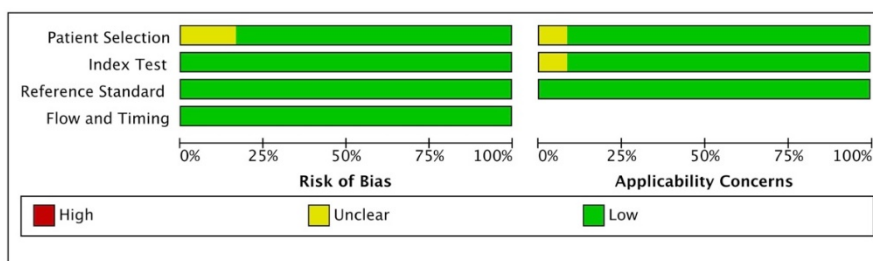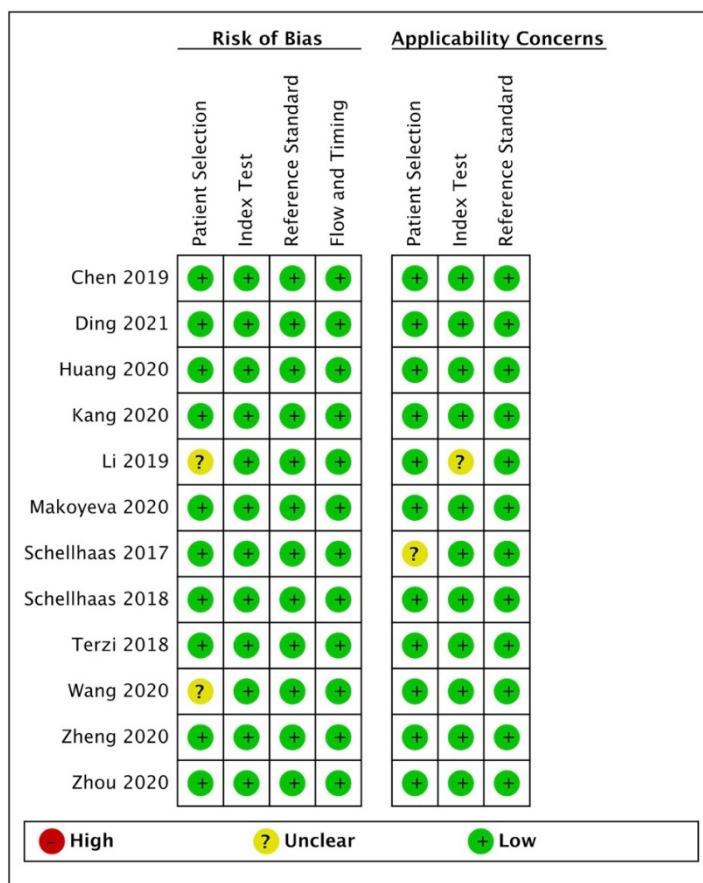

Figure S1 Evaluation of study quality based on the updated Quality Assessment of Diagnostic Accuracy Studies (QUADAS-2) tool.
